# Supplementary material for: Pharmacological and Parenteral Nutrition-Based Interventions in Microvillus Inclusion Disease
Source: PubMed Central journal article supplement (PMC7794843; doi:10.3390/jcm10010022), 2020-12-23
Supplement: jcm-10-00022-s001.pdf [file jcm-10-00022-s001.pdf]

**Supplementary table 1. Clinical details from published MVID case reports.**

| References                 | PMID#    | Patients number | Gender | Gestation (week) | Birth body weight (g) | Polyhydramnios | Onset (day) | Stool output (ml/kg/d) | Feces electrolyte (mmol/L) |                 |                | Feces osmolarity (mOsm/kg) | Feces PH value | Dead/ Alive | Follow-up  |
|----------------------------|----------|-----------------|--------|------------------|-----------------------|----------------|-------------|------------------------|----------------------------|-----------------|----------------|----------------------------|----------------|-------------|------------|
|                            |          |                 |        |                  |                       |                |             |                        | Na <sup>+</sup>            | Cl <sup>-</sup> | K <sup>+</sup> |                            |                |             |            |
| Lingaldinna et al. (2017)  | 28842815 | 1               | Male   | 38               | 3500                  |                | 3           |                        | 78                         | 64              | 7.3            |                            | 7              | Dead        | 1 month    |
|                            |          | 2               | Female | 34               | 2000                  |                | 5           |                        |                            |                 |                |                            | 7              | Dead        | 36 days    |
| Schoen et al. (2017)       | 29546954 | 1               | Male   | 36               |                       | No             | 10          | 190                    | 120                        | 67              |                | 30                         |                | Alive       | 36 months  |
| Perry et al. (2014)        | 25111220 | 1               | Female |                  |                       |                | 150         |                        | 15                         |                 |                |                            |                | Alive       | 132 months |
| Burgis et al. (2013)       | 23525737 | 1               | Male   | at term          |                       |                | 6           | 150                    |                            |                 |                |                            |                | Alive       | 168 months |
| Siahanidou et al. (2013)   | 23354788 | 1               | Female | 35               | 2330                  | Yes            | 1           |                        | 85                         | 78              | 22             |                            |                | Dead        | 7 months   |
| AI-Sinani et al. (2012)    | 23226823 | 1               | Female | at term          |                       | No             | 3           | 100                    |                            |                 |                |                            |                | Dead        | 4 months   |
| Thomas et al. (2012)       | 22318102 | 1               | Female | 35               | 2320                  | Yes            | 3           |                        | 35                         | 21              |                |                            |                | Dead        | 23 days    |
| Vora et al. (2012)         | 22197941 | 1               | Female | 37               | 2900                  | Yes            | 1           | 100                    | 78                         | 42              | 40             | 11                         |                | Alive       | 4 days     |
| Fuchs et al. (2011)        | 22152886 | 1               | Male   | 36               |                       |                | 4           | 148                    |                            |                 |                |                            |                | Alive       | 41 months  |
| Shahid et al. (2012)       | 21968248 | 1               | Male   | at term          | 2734                  | No             | 3           | 175                    | 84                         | 68              | 13             |                            |                | Alive       | 3 months   |
| Khubchandani et al. (2011) | 21299349 | 1               | Male   | 35               |                       |                | 3           |                        |                            |                 |                |                            | 6              | Dead        | 2 months   |
| Gathungu et al. (2008)     | 18277898 | 1               | Male   | 34               | 2450                  | No             | 8           |                        | 112                        | 113             | 21.6           | 292                        |                | Alive       | 12 days    |
| Amosu et al. (2007)        | 17418172 | 1               | Male   | 31               |                       |                | 3           | 100                    | 139                        | 105             | 4.7            | 279                        |                | Alive       | 12 days    |
| Kucinskiene et al. (2004)  | 15456973 | 1               | Female | 37               | 2530                  |                | 1           | 200                    |                            |                 |                |                            |                | Dead        | 1.5 months |
| Mierau et al. (2001)       | 11783915 | 1               | Male   | at term          |                       |                | 6           | 115                    | 95                         | 95              | 30             | 270                        | 9              | Alive       | 5 months   |
| Ruemmele et al. (2001)     | 11414303 | 1               | Male   | 36               | 2700                  | NO             | 2           | 200                    | 100                        | 60              | 17.5           |                            |                | Alive       | 4 months   |

|                              |          |   |        |         |      |     |    |     |     |     |      |     |     |       |            |
|------------------------------|----------|---|--------|---------|------|-----|----|-----|-----|-----|------|-----|-----|-------|------------|
| Kennea et al. (2001)         | 11251929 | 1 | Male   | 35      | 3720 | Yes |    | 300 |     |     |      |     |     | Alive | 3 days     |
| Wilson et al. (2001)         | 11173328 | 1 | Male   | 36      | 2740 | No  | 3  |     | 76  | 79  | 39   |     |     | Dead  | 6 months   |
| Croft et al. (2000)          | 10941974 | 1 | Female | at term | 3510 |     | 11 |     | 108 | 55  | 11.9 | 330 |     | Alive | 39 months  |
| Bunn et al. (2000)           | 10941971 | 1 | Female | 34      | 2100 | No  | 6  | 175 |     |     |      |     |     | Alive | 24 months  |
| Heinz-Erian et al. (1999)    | 9932857  | 1 | Female | 36      |      |     | 10 | 170 |     |     |      | 261 |     | Alive | 9 months   |
| Pohl et al. (1999)           | 9880458  | 1 | Male   | 39      | 3500 |     | 6  | 95  | 110 | 85  | 7    |     |     | Alive | 24 months  |
|                              |          | 2 | Male   | 38      | 2600 |     | 6  | 135 | 81  | 44  | 2    |     |     | Alive | 96 months  |
|                              |          | 3 | Male   | 36      | 3300 |     | 6  | 150 | 115 | 96  | 5    |     |     | Alive | 84 months  |
|                              |          | 4 | Female | 39      | 3160 |     | 4  | 175 | 107 | 84  | 18   |     |     | Alive | 48 months  |
|                              |          | 5 | Female | 37      | 2700 |     | 4  | 100 | 6   |     | 27   |     |     | Dead  | 36 months  |
| Kagitani et al. (1998)       | 9844114  | 1 | Male   | 38      | 3300 | No  | 1  | 75  |     |     |      |     |     | Alive | 132 months |
| Michail et al. (1998)        | 9822319  | 1 | Male   | 36      | 3090 | No  | 1  | 100 | 119 | 111 | 14   |     | 6.5 | Alive | 3 months   |
|                              |          | 2 | Male   |         |      |     | 14 | 150 | 105 | 74  | 12   | 281 |     | Alive | 9 months   |
| Randak et al. (1998)         | 9740207  | 1 | Male   | at term | 3900 | No  | 14 | 178 | 105 | 74  | 12.1 | 281 | 8   | Dead  | 18 months  |
| Beck et al. (1997)           | 9364305  | 1 | Female | 36      | 2700 | No  |    | 175 |     |     |      |     |     | Alive | 3 months   |
| Assmann et al. (1997)        | 9323563  | 1 | Male   | 33      | 2950 | Yes | 1  |     | 99  |     | 12   | 240 |     | Dead  | 7 months   |
| Herzog et al. (1996)         | 8732907  | 1 | Male   | at term | 3350 | No  | 7  | 50  |     |     |      |     |     | Alive | 7 months   |
| Raafat et al. (1994)         | 7959671  | 1 | Female | at term | 4100 | No  | 14 | 60  | 91  |     |      |     |     | Dead  | 39 months  |
|                              |          | 2 | Male   | at term | 4200 | No  | 14 | 50  | 100 |     |      |     |     | Dead  | 5 months   |
|                              |          | 3 | Male   | at term | 3800 | No  | 7  |     | 95  |     |      |     |     | Alive | 58 months  |
| Nathavitharana et al. (1994) | 8067796  | 1 | Male   | 38      | 3325 | No  | 1  | 166 | 58  | 36  | 15   | 309 |     | Dead  | 9 days     |
|                              |          | 2 | Male   | 35      | 2880 | No  | 2  | 200 |     |     |      |     |     | Dead  | 4 months   |
| Nizet et al. (1994)          | 8032396  | 1 | Female | 35      | 2810 | No  | 3  | 120 | 104 |     | 19   | 240 |     | Alive | 7 months   |

|                          |          |   |        |         |      |     |     |     |     |     |      |       |            |
|--------------------------|----------|---|--------|---------|------|-----|-----|-----|-----|-----|------|-------|------------|
| Schofield et al. (1992)  | 1319670  | 1 | Female | 37      | 2700 | No  | 4   | 200 | 6   |     | 27   | Dead  | 37 months  |
| Bell et al. (1991)       | 1660676  | 1 | Male   | at term | 3530 | Yes | 1   | 150 | 103 | 89  | 19   | Alive | 72 months  |
|                          |          | 2 | Male   | 37      | 3300 | Yes | 1   | 150 | 122 | 102 | 19.4 | Alive | 9 months   |
| Couper et al. (1989)     | 2759484  | 1 | Female | at term | 2300 | No  | 3   | 85  | 100 | 82  | 29   | Alive | 13 months  |
| Phillips et al. (1985)   | 3977385  | 1 | Female | 37      | 2500 | No  | 2   |     | 91  |     |      | Dead  | 6 months   |
|                          |          | 2 | Female | 34      | 2200 | No  | 4   |     | 93  |     |      | Dead  | 6 months   |
| Mendes et al. (2014)     | 25635218 | 1 | Female | 36      | 2800 |     | 1   | 120 | 83  |     | 8    | Dead  | 9 months   |
| Elena et al.             |          | 1 | Female | 36      |      |     | 7   | 100 |     |     |      | Alive | 13 months  |
| Sadiq et al. (2019)      | 31559144 | 1 | Female | 35      | 2445 | No  | 1   |     |     |     |      | Alive | 1 month    |
| Comegna et al. (2018)    | 30564347 | 1 | Male   | 36      | 2820 |     | 1   |     |     |     |      | Dead  | 23 months  |
|                          |          | 2 | Male   | 37      | 3280 | Yes | 1   |     |     |     |      | Dead  | 7 months   |
| Khalsi et al. (2018)     | 30364420 | 1 | Male   | 35      | 3030 | No  | 5   |     |     |     |      | Dead  | 3 months   |
| Alsaleem et al. (2017)   | 29282386 | 1 | Male   | at term |      | No  | 3   |     |     |     |      | Alive | 1 month    |
| Bulut et al. (2017)      | 28707991 | 1 | Male   | at term | 3300 | No  | 2   |     |     |     |      | Alive | 5 months   |
| Tran et al. (2017)       | 27682357 | 1 | Male   |         |      |     |     |     |     |     |      | Alive | 48 months  |
| Perry et al. (2014)      | 25111220 | 1 | Female | 36      | 2950 | No  | 2   |     |     |     |      | Alive | 36 months  |
|                          |          | 2 | Male   | at term | 3290 |     | 7   |     |     |     |      | Alive | 24 months  |
|                          |          | 3 | Male   | at term | 3570 | Yes | 42  |     |     |     |      | Alive | 12 months  |
|                          |          | 4 | Male   | at term | 3360 | No  | 5   |     |     |     |      | Alive | 144 months |
|                          |          | 5 | Male   | 40      | 2350 | No  |     |     |     |     |      | Alive | 156 months |
|                          |          | 6 | Male   | 31      | 1645 |     | 420 |     |     |     |      | Alive | 288 months |
|                          |          | 7 | Male   |         |      |     | 150 |     |     |     |      | Alive | 336 months |
| Wiegerinck et al. (2014) | 24726755 | 1 | Female |         |      |     | 2   |     |     |     |      | Alive | 12 months  |

|                           |          |   |        |         |      |     |    |  |       |            |
|---------------------------|----------|---|--------|---------|------|-----|----|--|-------|------------|
|                           |          | 2 | Male   |         |      |     | 14 |  | Alive | 18 months  |
| Oatman et al. (2014)      | 23648791 | 1 | Male   |         |      |     | 30 |  | Alive | 132 months |
| Chiang et al. (2015)      | 23608388 | 1 | Male   | 36      |      |     | 1  |  | Dead  | 5 months   |
| Golachowska et al. (2012) | 22441677 | 1 | Male   | at term |      |     | 3  |  | Alive | 60 months  |
|                           |          | 2 | Male   |         |      |     | 60 |  | Alive | 60 months  |
| Fuchs et al. (2011)       | 22152886 | 1 | Male   | 37      |      |     | 1  |  | Alive | 48 months  |
|                           |          | 2 | Male   | 37      |      |     | 3  |  | Alive | 48 months  |
| Chen et al. (2011)        | 22030065 | 1 | Female | 23      | 634  | No  |    |  | Dead  | 6 months   |
| Chen et al. (2010)        | 21199752 | 1 | Male   | 36      | 3355 | Yes | 1  |  | Dead  | 6 months   |
| Rund et al. (2006)        | 16454574 | 1 | Male   | 35      |      |     | 1  |  | Alive | 1.5 months |
| Weeks et al. (2003)       | 14708724 | 1 | Female |         |      |     |    |  | Alive | 8 months   |
| Gambarara et al. (2003)   | 14697977 | 1 | Male   |         |      |     | 2  |  | Alive | 165 months |
|                           |          | 2 | Male   |         |      |     |    |  | Alive | 36 months  |
|                           |          | 3 | Female |         |      |     | 2  |  | Alive | 132 months |
|                           |          | 4 | Male   |         |      |     | 1  |  | Alive | 13 months  |
| Martinez et al. (2002)    | 12028658 | 1 | Female | 35      | 2110 |     | 1  |  | Alive | 4 months   |
| Goldman et al. (2002)     | 11903944 | 1 | Male   |         |      |     | 30 |  | Alive | 36 months  |
| Levental et al. (2002)    | 11883547 | 1 | Female |         |      |     | 21 |  | Alive | 60 months  |
| Ameen et al. (2000)       | 11208062 | 1 | Female | at term |      | No  |    |  | Alive | 36 months  |
| Kaneko et al. (1999)      | 10484813 | 1 | Male   | 35      | 2805 |     | 1  |  | Dead  | 37 months  |
|                           |          | 2 | Male   | 37      | 3308 |     | 2  |  | Alive | 132 months |
|                           |          | 3 | Female | 35      | 2922 |     | 2  |  | Dead  | 7 months   |
|                           |          | 4 | Male   | 34      | 2558 |     | 2  |  | Dead  | 4 months   |

|                            |          |   |        |         |      |    |   |       |           |
|----------------------------|----------|---|--------|---------|------|----|---|-------|-----------|
| Beck et al. (1997)         | 9364305  | 1 | Male   | 39      | 3000 | No | 3 | Alive | 8 months  |
| Roggero et al. (1997)      | 9142307  | 1 | Male   | at term | 3570 | No | 2 | Dead  | 29 months |
| Drumm et al. (1988)        | 2891946  | 1 | Female | 33      | 1900 |    | 1 | Dead  | 11 months |
|                            |          | 2 | Female | 39      |      |    | 1 | Dead  | 22 months |
| Walker-Smith et al. (1985) | 2866310  | 1 | Female |         |      |    |   | Alive | 5 months  |
| Phulware et al. (2019)     | 31049800 | 1 | Male   |         |      |    |   | Alive | 3 months  |
| Cheng et al. (2017)        | 28899465 | 1 | Female | 39      | 2850 |    | 2 | Alive | 1 month   |
| Ozge et al. (2019)         |          | 1 | Male   | 36      |      |    | 2 | Alive | 6 months  |
| Cegla et al. (1993)        | 8114773  | 1 |        |         |      |    |   |       |           |
| Rhoads et al. (1991)       | 1993505  | 1 |        |         |      |    |   |       |           |
| Ukarapol et al. (2001)     | 11800313 | 1 | Male   |         |      |    |   |       |           |
| Mao et al. (2016)          | 27984607 | 1 |        |         |      |    |   |       |           |
| Van Hoeve et al. (2016)    | 27477384 | 1 | Male   |         |      |    |   |       |           |
| Paulus et al. (2015)       | 26057766 | 1 | Male   | at term |      |    |   |       |           |
| Thoeni et al. (2013)       | 24138727 | 1 |        |         |      |    |   |       |           |
| Poley et al. (2006)        | 17784640 | 1 |        |         |      |    |   |       |           |
| Morrone et al. (2006)      | 16609911 | 1 |        |         |      |    |   |       |           |
|                            |          | 2 |        |         |      |    |   |       |           |
| Youssef et al. (2004)      | 15785408 | 1 |        |         |      |    |   |       |           |
| Lopez et al. (2001)        | 11339115 | 1 | Male   |         |      |    |   |       |           |
| Acar et al. (1999)         | 10770118 | 1 | Female |         |      |    |   |       |           |
| Gambarara et al. (1997)    | 9142308  | 1 | Male   |         |      |    |   |       |           |
|                            |          | 2 | Male   |         |      |    |   |       |           |

|                          |          |    |        |         |      |    |   |       |           |
|--------------------------|----------|----|--------|---------|------|----|---|-------|-----------|
|                          |          | 3  | Female |         |      |    |   |       |           |
| Steininger et al. (1997) | 9065586  | 1  |        |         |      |    |   |       |           |
|                          |          | 2  |        |         |      |    |   |       |           |
| Oliva et al. (1994)      | 8119548  | 1  | Female | at term | 2870 | No |   | Alive | 53 months |
| Mendes et al. (2014)     | 25635218 | 1  | Female | 36      | 2800 |    | 3 |       |           |
| Al-Daraji et al. (2010)  | 21070163 | 1  | Male   |         |      |    |   | Alive | 3 months  |
|                          |          | 2  | Famale |         |      |    |   | Alive | 2 months  |
|                          |          | 3  | Female |         |      |    |   |       |           |
|                          |          | 4  | Female |         |      |    |   |       |           |
|                          |          | 5  | Female |         |      |    |   | Alive | 2 months  |
|                          |          | 6  | Female |         |      |    |   | Dead  | 11 months |
|                          |          | 7  | Female |         |      |    |   | Alive | 1 month   |
|                          |          | 8  | Female |         |      |    |   |       |           |
|                          |          | 9  | Male   |         |      |    |   |       |           |
|                          |          | 10 | Male   |         |      |    |   |       |           |
|                          |          | 11 | Male   |         |      |    |   | Alive | 1 month   |
|                          |          | 12 | Male   |         |      |    |   |       |           |
|                          |          | 13 | Male   |         |      |    |   | Alive | 2 months  |
|                          |          | 14 | Female |         |      |    |   | Alive | 5 months  |
|                          |          | 15 | Male   |         |      |    |   | Alive | 4 months  |
|                          |          | 16 | Female |         |      |    |   | Alive | 2 months  |
|                          |          | 17 | Male   |         |      |    |   | Alive | 1 month   |

---

We searched EMBASE and MEDLINE databases using the following search strings: ((microvill\* inclusion disease) OR (microvill\* atrophy)) AND case report) to collect all published MVID case reports. Totally, 83 valid case reports reporting on 131 MVID patients were retrieved.
